# Supplementary material
Source: PubMed Central journal article supplement (PMC2629259)
Supplement: 0810631106_0810631106SI.pdf [file 0810631106_0810631106SI.pdf]

# Supporting Information

Zheng *et al.* 10.1073/pnas.0810631106

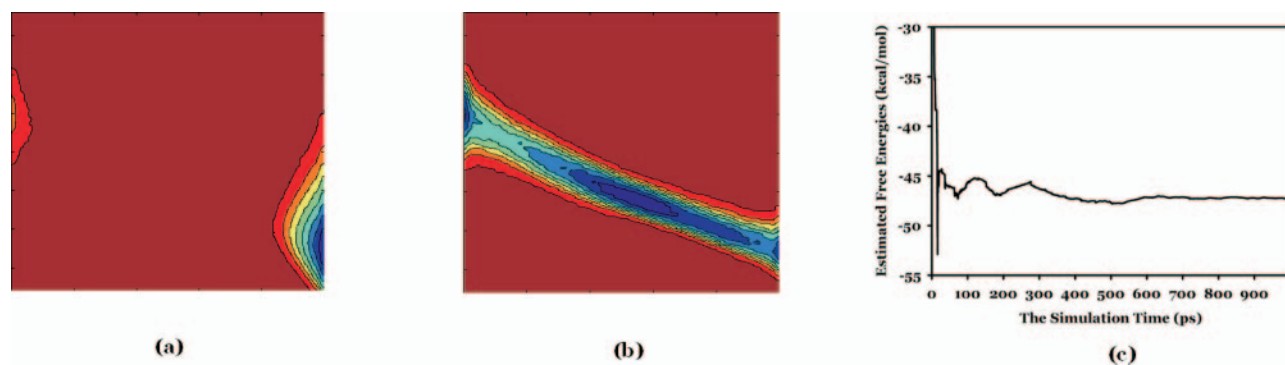

**Fig. S1.** The OSRW simulation results on model study 1 to illustrate the importance of adding the order parameter space surface flattening term. (a) The free-energy surface along the orthogonal space produced by 1-ns simulation based on the OSRW formula without the order parameter space surface flattening term. (b) The free-energy surface along the orthogonal space produced by 1-ns simulation based on the OSRW formula with the order parameter space surface flattening term. (c) The time-dependent free-energy value changes, which were obtained based on the OSRW formula with the order parameter space surface flattening term.

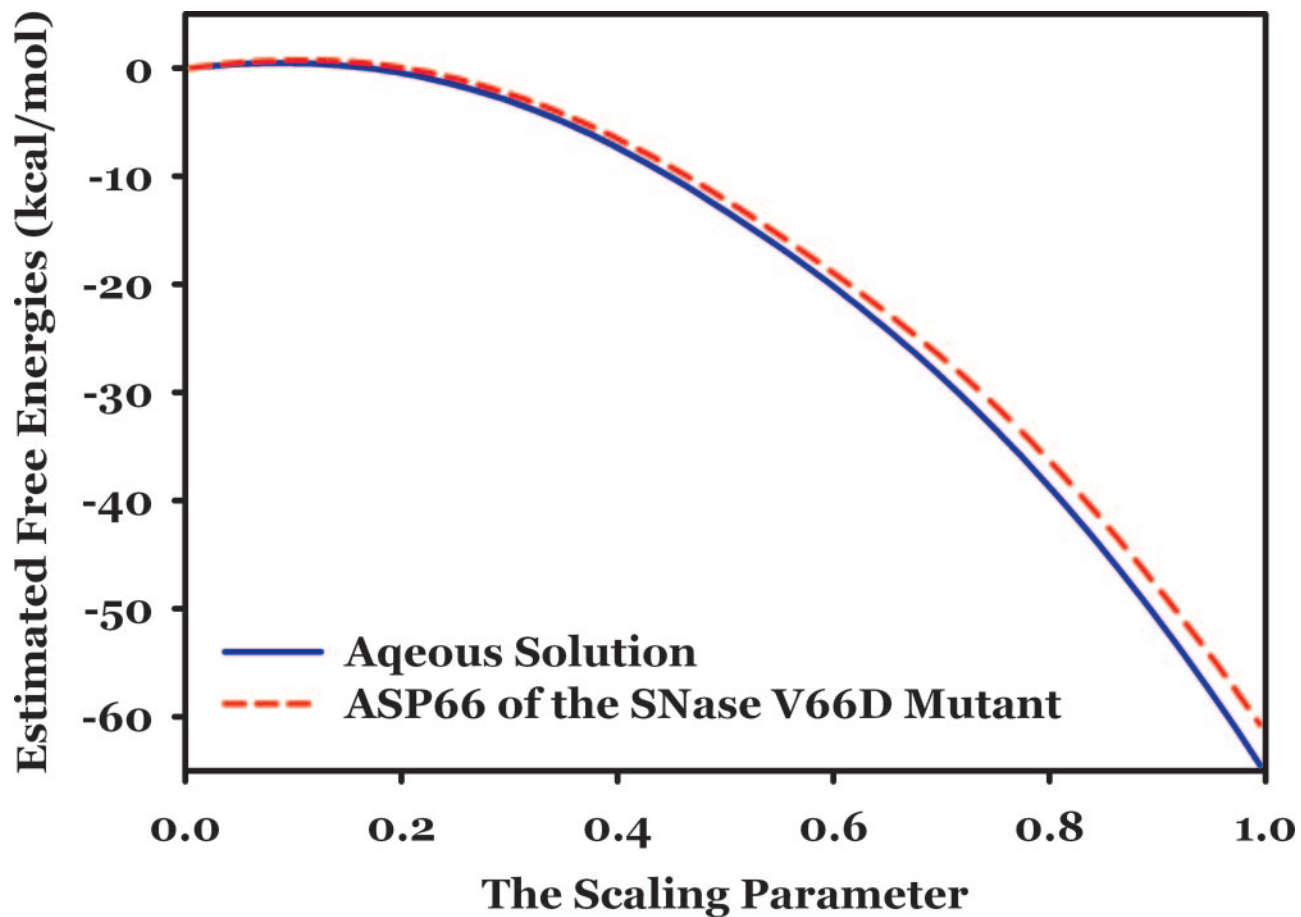

Fig. S2. The free-energy simulation results in model study 2: the scaling parameter-dependent free-energy changes. Dashed lines indicate the results on the protein (the SNase mutant) system; solid lines indicate the results on the solution system.

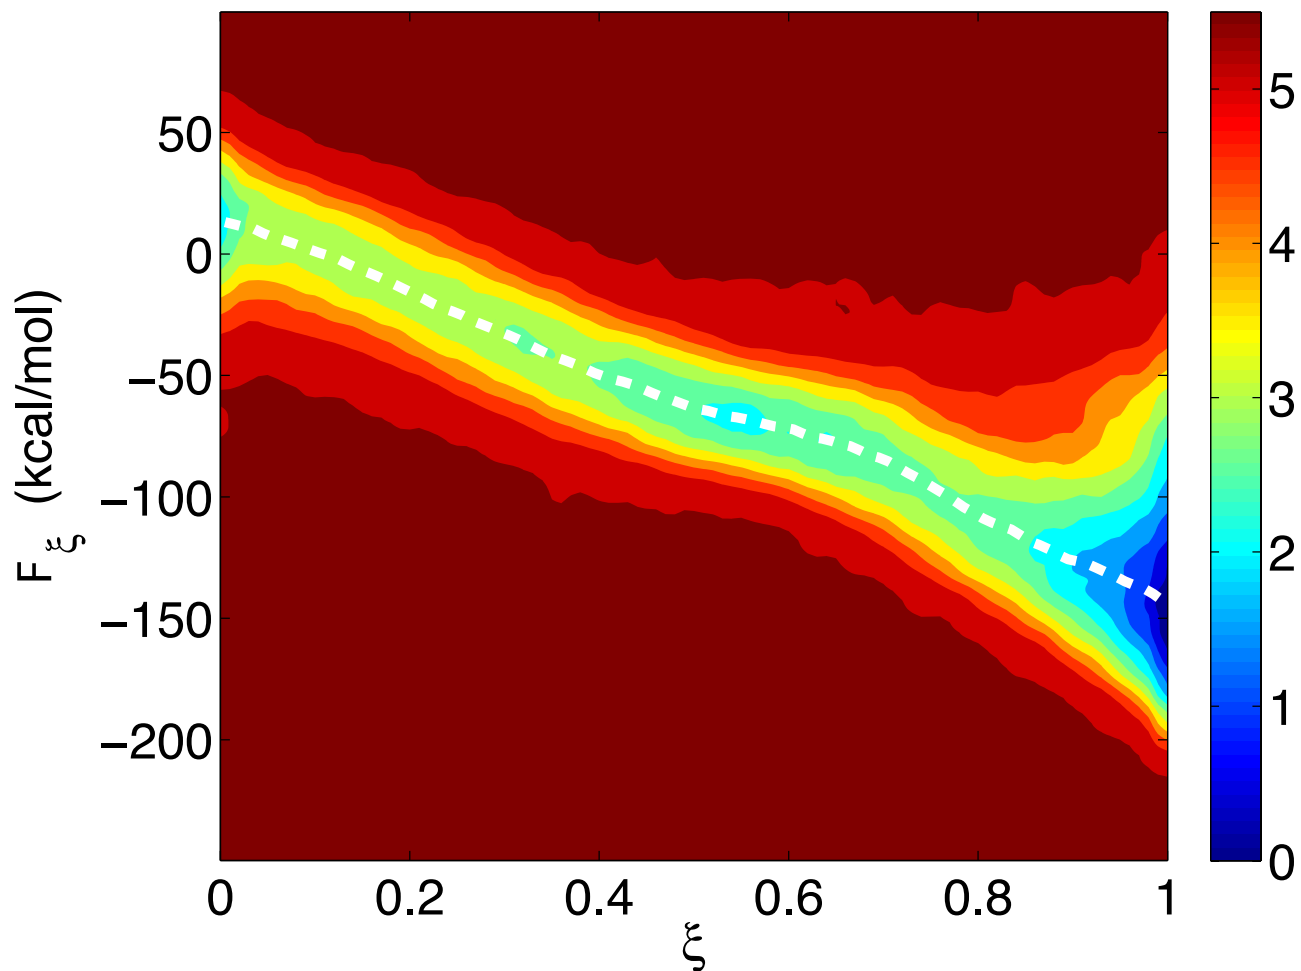

Fig. S3. The free-energy surface along the orthogonal space produced by 600-ps OSRW simulation. In the middle, the white dashed curve shows the estimated free-energy derivatives.

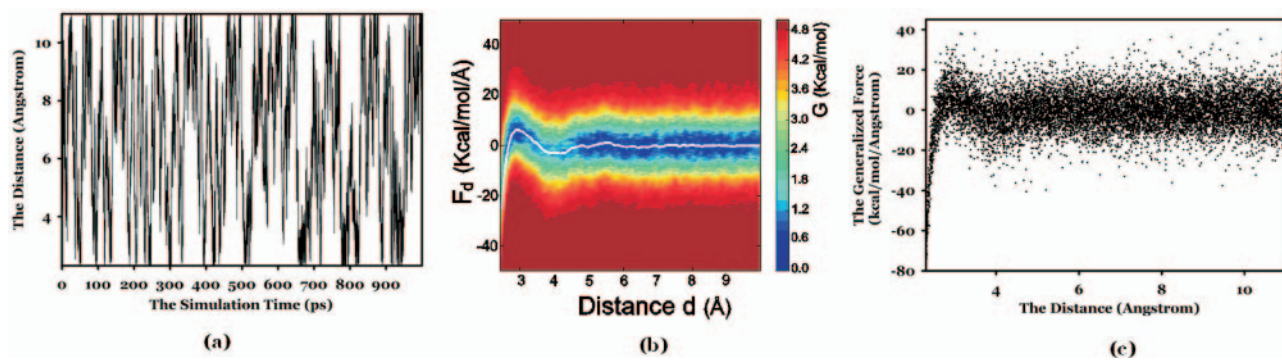

**Fig. 54.** The behaviors of the OSRW simulation on the separation of the sodium and the chloride ion pair in aqueous solution. (a) The time-dependent distance change. (b) The free-energy surface along the orthogonal space produced by 250-ps OSRW simulation; in the middle, the white dashed curve shows the estimated generalized forces. (c) The distribution of the samples collected during the OSRW simulation in the orthogonal space.
